# Supplementary material
Source: PubMed Central journal article supplement (PMC3143396)
Supplement: 97320630006340S1.pdf [file 97320630006340S1.pdf]

## Supplementary material:

**Table 1:** siRNA result for Haemagglutinin for Asia

| S# | SiRNA target sites + 2 Nucleotides overhang | % conservation  |
|----|---------------------------------------------|-----------------|
| 1  | CAGCAACTGTTACCCTTATGAtg                     | 82.9 (834/1006) |
| 2  | AAGCATCTATTGGACAATAGTaa                     | 81.6 (821/1006) |
| 3  | TACGGTTTCAGGCATCAAAAATtc                    | 81.2 (817/1006) |
| 4  | ACGGTTTCAGGCATCAAAAATct                     | 81.2(817/1006)  |
| 5  | ATGGAAGCATTCCCAATGACAaa                     | 80.8 (813/1006) |
| 6  | TGGAAGCATTCCCAATGACAaac                     | 80.8 (813/1006) |
| 7  | CAGCAACTGTTACCCTTATGAtg                     | 72.2 (86/119)   |
| 8  | TACGGTTTCAGGCATCAAAAATtc                    | 72.2 (86/119)   |
| 9  | ACGGTTTCAGGCATCAAAAATct                     | 72.2 (86/119)   |
| 10 | GGCAACATTAGGTGCAACATTtg                     | 69.7 (83/119)   |
| 11 | AGGTGCAACATTTCGATTGAgT                      | 68 (81/119)     |
| 12 | ATGGAAGCATTCCCAATGACAaa                     | 67.2 (80/119)   |
| 13 | TGGAAGCATTCCCAATGACAaac                     | 67.2 (80/119)   |

**Table 2:** siRNA result for Neuraminidase for Asia

| S# | SiRNA target sites + 2 Nucleotides overhang | % conservation   |
|----|---------------------------------------------|------------------|
| 1  | TAGCATGGTCCAGCTCAAGTTgt                     | 85 (1112/1307)   |
| 2  | CTCAAGTTGTACGATGGAAAag                      | 84.1 (1100/1307) |
| 3  | TGCAACTGCTAGCTTCATTTAtg                     | 83.3 (1090/1307) |
| 4  | ATGCAACTGCTAGCTTCATTTat                     | 83.3 (1089/1307) |
| 5  | GTGCTTTTATGTGGAGTTGATaa                     | 82 (1073/1307)   |
| 6  | ATCCAAAATCAAAAAGATAATAAca                   | 81.4 (1064/1307) |
| 7  | ATGAATCCAAATCAAAAAGATAat                    | 74 (120/162)     |
| 8  | ATCCAAAATCAAAAAGATAATAAca                   | 74 (120/162)     |
| 9  | TAGCATGGTCCAGCTCAAGTTgt                     | 72.8 (118/162)   |
| 10 | CTCAAGTTGTACGATGGAAAag                      | 72.2 (117/162)   |
| 11 | TGCAACTGCTAGCTTCATTTAtg                     | 71.6 (116/162)   |
| 12 | ATGCAACTGCTAGCTTCATTTat                     | 70.9 (115/162)   |
| 13 | TTGCACCTTTTCTAAGGACAat                      | 70.3 (114/162)   |

**Table 3:** Haemagglutinin sequences used for BLAST and multiple sequence alignment.

| S# | Influenza A | Accession Number | Country of Origin |
|----|-------------|------------------|-------------------|
| 1  | H1          | 33622380         | Beijing           |
| 2  | H1          | 33622384         | Shenzhen          |
| 3  | H1          | 221340           | A/Suita/ Japan    |
| 4  | H1          | 554652           | USSR              |
| 5  | H2          | 305115           | Japan             |
| 6  | H2          | 408525           | Krasnodar         |
| 7  | H3          | 49339089         | Hong kong         |
| 8  | H3          | 77861715         | Hong Kong         |
| 9  | H3          | 18615859         | Udorn             |
| 10 | H3          | 71558927         | Moscow            |
| 11 | H5          | 71013498         | Hong Kong         |
| 12 | H5          | 2865380          | Hong Kong         |
| 13 | H5          | 2833657          | Hong Kong         |
| 14 | H5          | 3421252          | Hong Kong         |
| 15 | H9          | 8894694          | Hong Kong         |

**Table 4:** Neuraminidase sequences used for BLAST and multiple sequence alignment.

| S# | Influenza A | Accession Number | Country of Origin |
|----|-------------|------------------|-------------------|
| 1  | N1          | 31096405         | China             |
| 2  | N1          | 31096413         | Hong Kong         |
| 3  | N1          | 31096415         | Hong Kong         |
| 4  | N1          | 2833659          | Hong Kong         |
| 5  | N1          | 3335423          | Hong Kong         |
| 6  | N1          | 47834892         | Hong Kong         |
| 7  | N1          | 47834894         | Hong Kong         |
| 8  | N1          | 324578           | Russia            |
| 9  | N2          | 38524538         | Japan             |
| 10 | N2          | 49473497         | Japan             |
| 11 | N2          | 418078           | China             |
| 12 | N2          | 8894698          | Hong Kong         |
| 13 | N2          | 21632606         | China             |
| 14 | N2          | 21632610         | China             |
| 15 | N2          | 81174818         | Hong Kong         |
| 16 | N2          | 8250669          | Russia            |
| 17 | N2          | 71553740         | Russia            |
